# Supplementary figures and images for: Impacts of seawater acidification on mantle gene expression patterns of the Baltic Sea blue mussel: implications for shell formation and energy metabolism
Source: Springer Nature journal article supplement (doi:10.1007/s00227-012-1930-9), 2012-05-07

CuA site

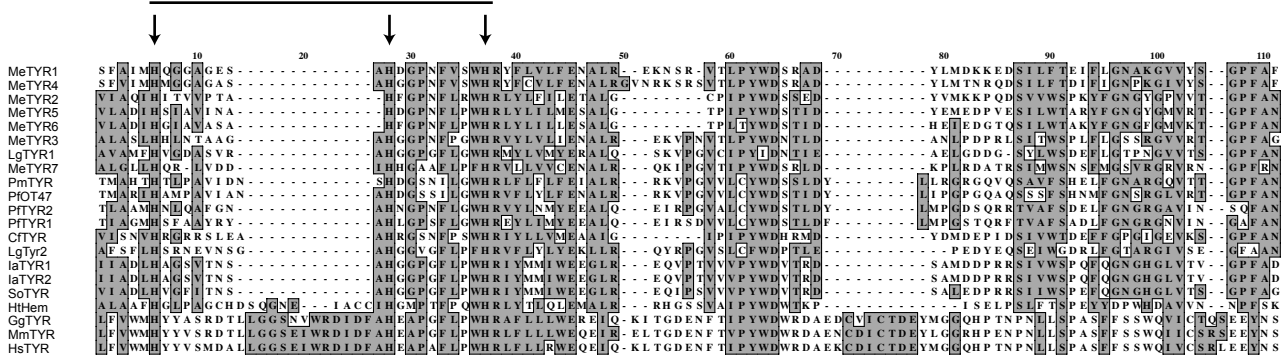

Supplement: MOESM2 [file 227_2012_1930_MOESM2_ESM.pdf]

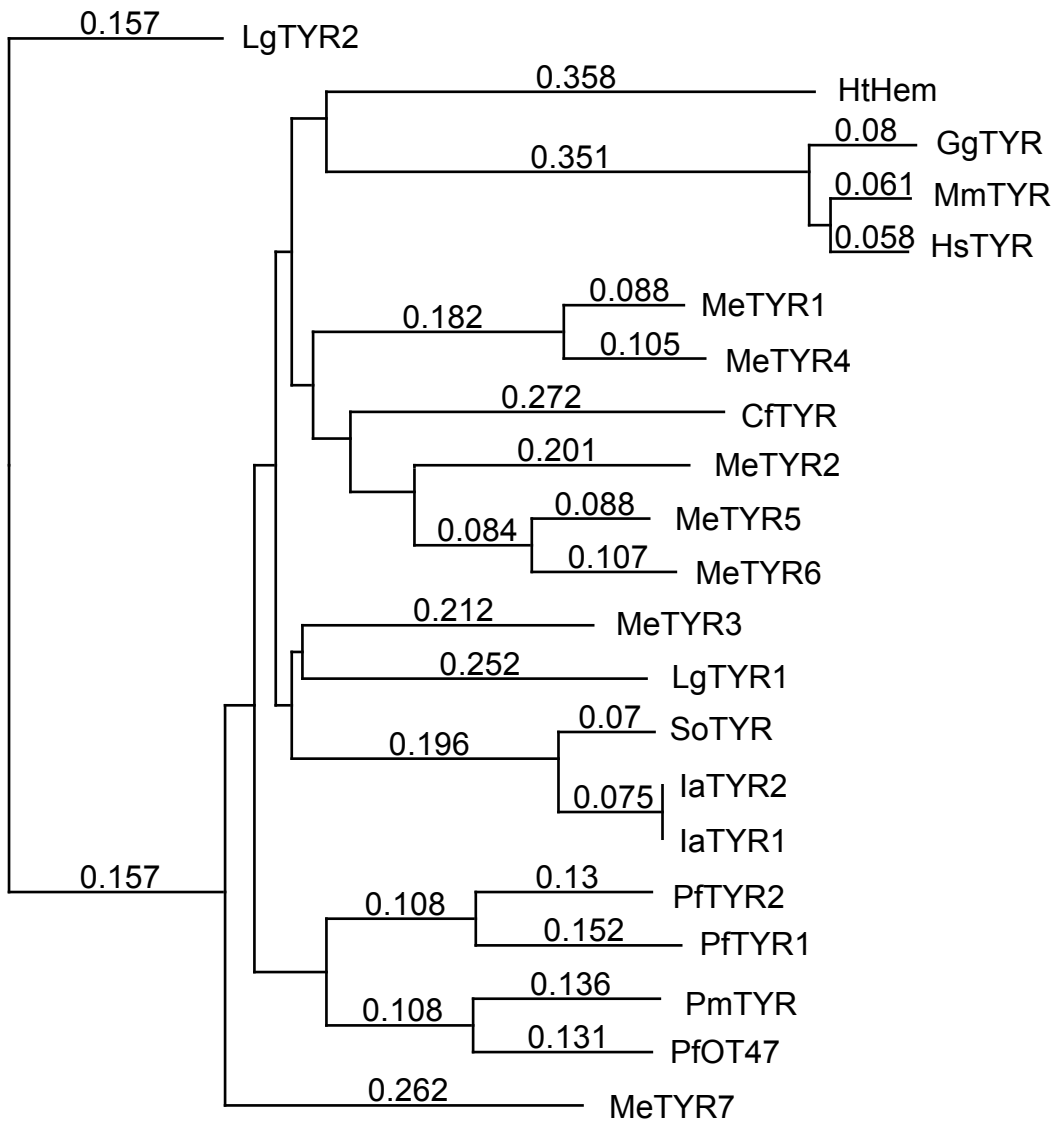

0.1

Supplement: MOESM3 [file 227_2012_1930_MOESM3_ESM.pdf]

a

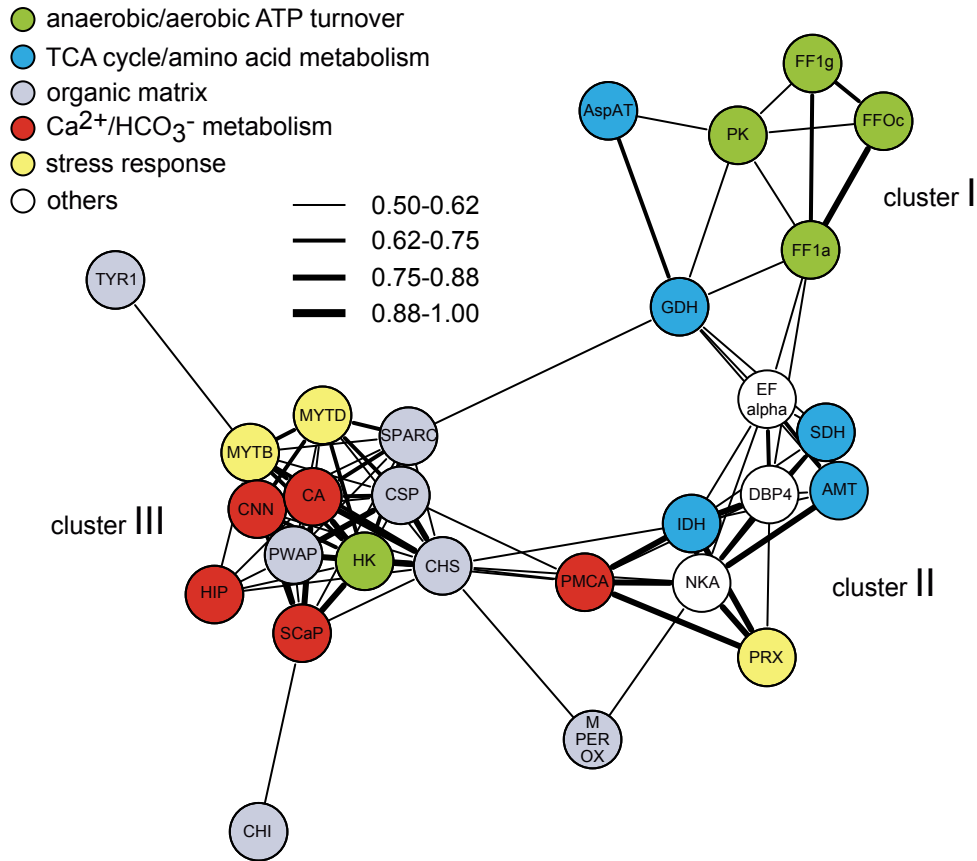

b

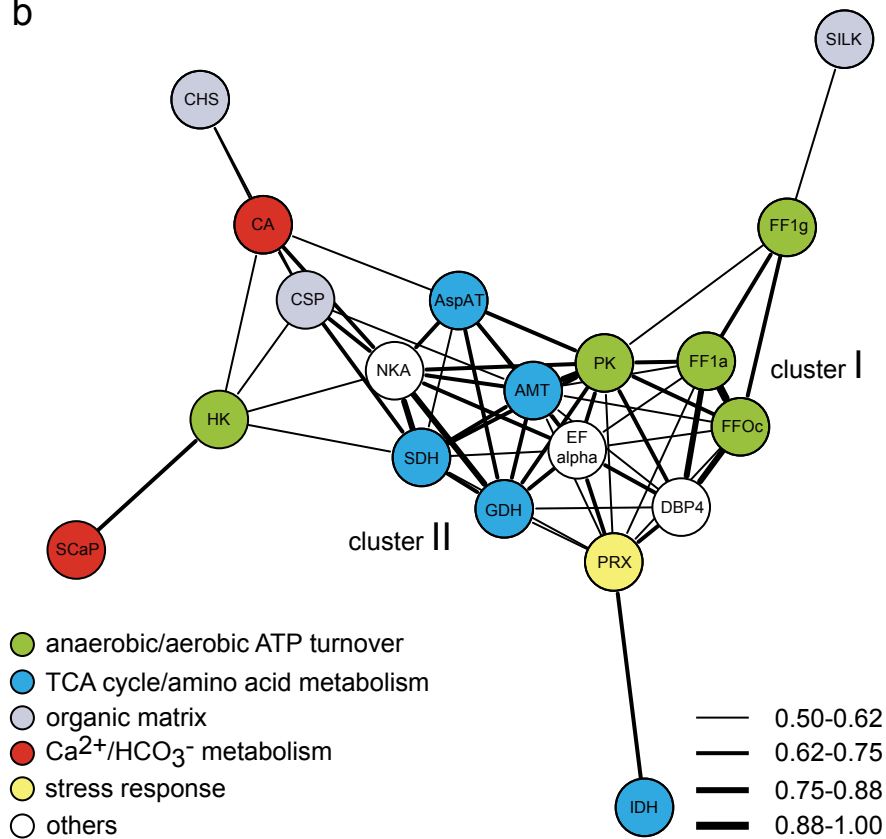

Supplement: MOESM1 [file 227_2012_1930_MOESM1_ESM.pdf]

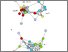

Supplement: MOESM1 [file 227_2012_1930_MOESM1_ESM.pdf]
